# Supplementary material for: In vivo and in vitro Approaches Reveal Novel Insight Into the Ability of Epicardium-Derived Cells to Create Their Own Extracellular Environment
Source: PubMed Central journal article supplement (PMC6594358; doi:10.3389/fcvm.2019.00081), 2019-06-19
Supplement: Image_3.pdf [file Image_3.pdf]

### Zymography Data

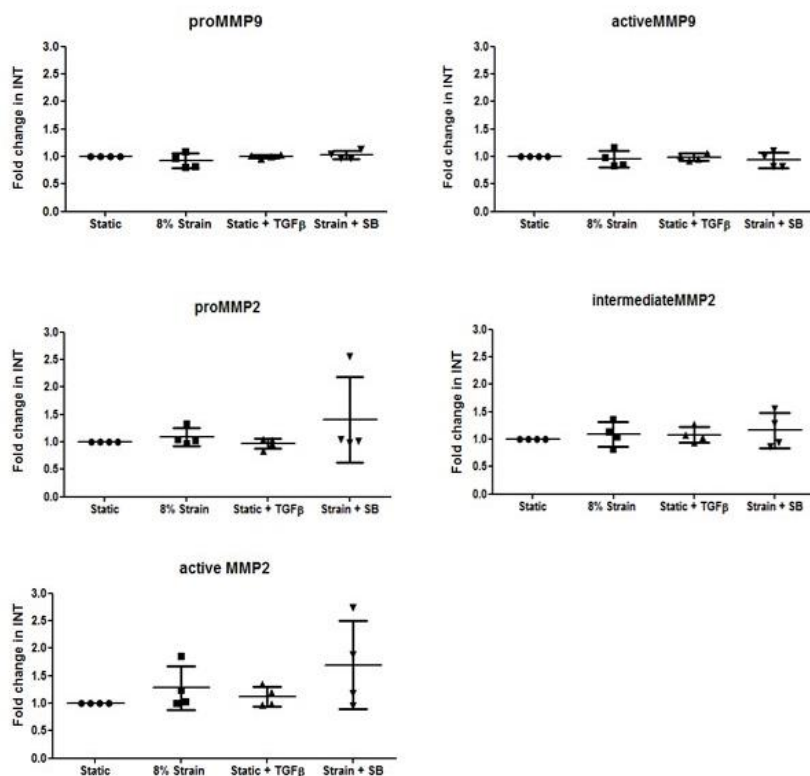

### Gene Expression

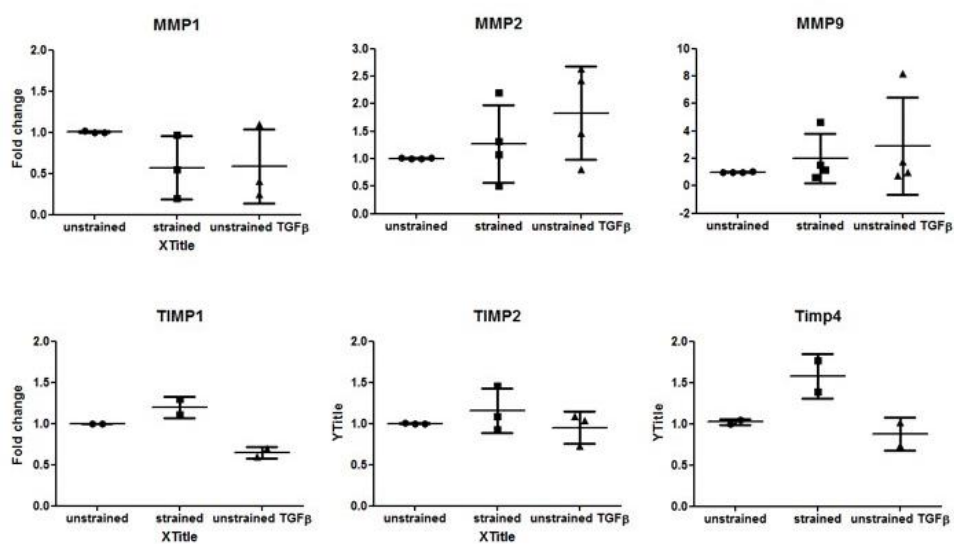

**Figure S3.** Data is presented as changes compared to unstrained conditions. There were no significant changes in expression of *MMPs* and *TIMPs* under TGFβ (0.5ng/ml) stimulation compared to unstrained conditions.
